# Supplementary material
Source: PubMed Central journal article supplement (PMC4426065)

## Supplementary Figure Legend

### Figure S1. Cell imaging for quantitation of Atg1 subunit stoichiometry at the PAS

JBY404 was imaged as fixed copy number standard. Representative bright field (A) and wide field fluorescence (B) images of the same JBY404 sample are shown. Bright LacI-GFP fluorescent puncta are visible in focus as indicated by yellow arrows. Atg1-GFP (B, C), Atg13-GFP (D, E), and Atg17-GFP (F, G) expressing yeast cells were fixed with (C, E, G) and without (B, D, F) rapamycin incubation. Bright Atg17-GFP puncta are visible in focus as indicated by yellow arrows. Scale bar: 5  $\mu$ m. Associated with Figure 1.

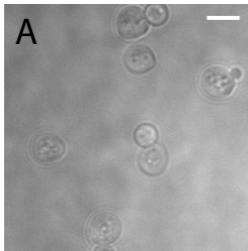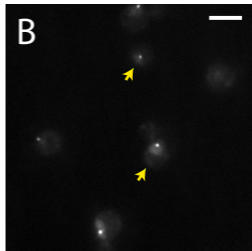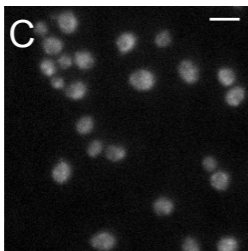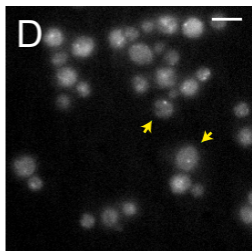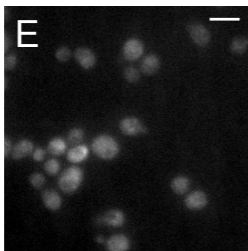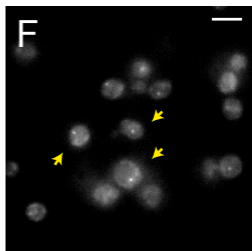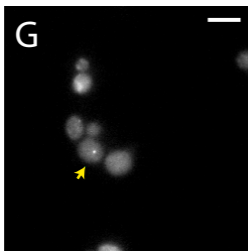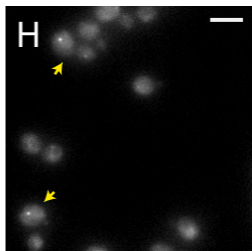

Supplement: NIHMS669812-supplement-2.pdf [file NIHMS669812-supplement-2.pdf]
